# Supplementary material for: Interfacial synthesis of ultrathin two-dimensional 2PbCO3·Pb(OH)2 nanosheets with high enzyme mimic catalytic activity
Source: Royal Society of Chemistry journal article supplement (doi:10.1039/c8qi01196f), 2018-12-21
Supplement: c8qi01196f1.pdf [file c8qi01196f1.pdf]

## Supporting Information

### Interfacial synthesis of ultrathin two-dimensional $2\text{PbCO}_3 \cdot \text{Pb}(\text{OH})_2$ nanosheets with high enzyme mimic catalytic activity

Danbo Wang,<sup>a</sup> Xiaonan Kan,<sup>a</sup> Chenyu Wu,<sup>c</sup> Xiaohuan Lin,<sup>d</sup> Haiyan Zheng,<sup>d</sup> Kuo Li,<sup>d</sup> Jikuan Zhao,<sup>\*b</sup>  
and Yingjie Zhao<sup>\*a</sup>

<sup>a</sup> Key Laboratory of Biobased Polymer Materials, Shandong Provincial Education Department; College of Polymer Science and Engineering, Qingdao University of Science and Technology, Qingdao 266042, P. R. China

<sup>b</sup> Key Laboratory of Optic-electric Sensing and Analytical Chemistry for Life Science, MOE; State Key Laboratory Base of Eco-chemical Engineering; College of Chemistry and Molecular Engineering, Qingdao University of Science and Technology, Qingdao 266042, P. R. China.

<sup>c</sup> Centre for Advanced Macromolecular Design, School of Chemical Engineering, The University of New South Wales, Sydney, NSW 2052, Australia.

<sup>d</sup> Center of High Pressure Science and Technology Advanced Research, Beijing 100094, P. R. China

[\*] Corresponding Authors: yz@qust.edu.cn, forestzhao@qust.edu.cn.

#### Contents

|                                                                                                                                                                                                                                                                     |    |
|---------------------------------------------------------------------------------------------------------------------------------------------------------------------------------------------------------------------------------------------------------------------|----|
| Characterization.....                                                                                                                                                                                                                                               | S2 |
| Materials and Methods.....                                                                                                                                                                                                                                          | S2 |
| Table S1. The position, Wyckoff position, occupancy and temperature factor of $2\text{PbCO}_3 \cdot \text{Pb}(\text{OH})_2$ .....                                                                                                                                   | S3 |
| Figure S1. Schematic illustrations of synthesis through displacement reaction.....                                                                                                                                                                                  | S4 |
| Figure S2. Optical microscopy for hexagonal structures on HMDS/Si(100).....                                                                                                                                                                                         | S4 |
| Figure S3. Photograph of $\text{H}_2\text{O}_2$ and TMB solutions in the presence of the prepared 2D nanosheets and the commercial $2\text{PbCO}_3 \cdot \text{Pb}(\text{OH})_2$ .....                                                                              | S4 |
| Figure S4. The time-dependent absorbance changes at 652 nm in the presence of the nanosheets with various concentrations of TMB.....                                                                                                                                | S5 |
| Figure S5. (A) UV-visible spectra of TMB (0.1–0.5 mM) and $\text{H}_2\text{O}_2$ (13 mM) solutions in the presence of the nanosheets. (B) UV-visible spectra of TMB (0.1 mM) and $\text{H}_2\text{O}_2$ (13–63 mM) solutions in the presence of the nanosheets..... | S5 |
| Figure S6. $\text{N}_2$ adsorption–desorption isotherms (77 K) of the 2D nanosheets (a) and the commercial $2\text{PbCO}_3 \cdot \text{Pb}(\text{OH})_2$ (b).....                                                                                                   | S5 |

## **General remarks**

*Characterization:* The atomic force microscopy images were recorded on Bruker Multimode 8 AFM with Nanoscope V controller. Scanning electron microscopy (SEM, JEOL, JSM-7500F, Japan) was used to investigate the structure of the as-prepared the nanosheets structures at an accelerating voltage of 5.0 KV. The morphological and crystalline characteristics of the films were further investigated by TEM (JEOL, JSL-2100) and selected area electron diffraction operating at a 200 kV accelerating voltage. The parameters were as follows: Al K $\alpha$  (1486.6 eV, 150 W) radiation was used as the X-ray source, the vacuum degree of the chamber was  $3.6 \times 10^{-9}$  mbar and the scan range was -10-1350 eV. The X-ray diffraction patterns of the samples were recorded using Cu-K $\alpha$  (1.54060 Å) radiation at 40 kV and 40 mA at ambient temperature (by a 2-theta range of 5–120° and a step size and rate of 0.04° and 5 seconds, respectively) of an X-ray diffractometer (XRD, Bruker Advance 2). The lattice parameters were determined by the Rietveld refinement method. N<sub>2</sub> adsorption isotherms were measured up to 1 bar at 77 K using a Micrometrics ASAP 2460 surface area analyzer. All UV-visible absorption spectra were obtained by using a U2910 model UV-visible spectroscope (Hitachi).

## **General experimental procedures**

### **Materials and Methods**

#### **Chemicals**

Lead (Pb), Lead sub-carbonate (2PbCO<sub>3</sub>·Pb(OH)<sub>2</sub>), Cupric Acetate Monohydrate (Cu(CH<sub>3</sub>COO)<sub>2</sub>·H<sub>2</sub>O), hexamethyldisilazane (HMDS) and copper acetate were all purchased from Tansoole and used as received. All aqueous solutions were prepared using Milli-Q water.

#### **HMDS modified SiO<sub>2</sub>/Si substrates**

Surface modification of SiO<sub>2</sub>/Si substrates by HMDS was carried out according to previous literatures. The samples were first cleaned ultrasonically several times in in *n*-hexane and chloroform. Then the substrates were submerged piranha solution at 80°C for 1 h and cleaned with pure water. Subsequently, the samples were dried at 90°C to remove the liquid water from the surfaces. The dried samples were exposed to the HMDS vapor at 110°C. The treatment was carried out in a vacuum desiccator that contained liquid HMDS in equilibrium with its vapor, and the samples to be modified were placed in a petri dish. The samples were exposed to the HMDS

vapor under vacuum for 4 h.

#### Synthesis of the 2D nanosheets $2\text{PbCO}_3 \cdot \text{Pb}(\text{OH})_2$

30 mL solution of  $\text{Cu}(\text{COOCH}_3)_2$  (0.01 mM) in  $\text{H}_2\text{O}$  was added to a 50 mL beaker containing 120.0 mg Pb particles. The reaction system was left undisturbed for 12 hours. The blue color of the  $\text{Cu}^{2+}$  faded and copper metal appeared at the surface of the Pb gradually. Ultrathin 2D nanosheets formed at the interface were then transferred onto hexamethyl disilazane (HMDS) modified  $\text{SiO}_2/\text{Si}$  substrates or Cu TEM grid by bringing the substrate close to the interface in the horizontal direction (Langmuir–Schäfer method) for further characterization analysis. For catalysis studies, a suspension of 2D nanosheets was collected by carefully sucking the interface and washing it by water for several times. To get the catalyst concentration, we took out 10 mL of the dispersing liquid and removed water in vacuo to get the weight and concentration of catalyst.

**Table S1.** The position, Wyckoff position, occupancy and temperature factor of  $2\text{PbCO}_3 \cdot \text{Pb}(\text{OH})_2$

| Atom | Wyckoff position | x          | y          | Z         | Occupancy | Beq( $\text{\AA}^2$ ) |
|------|------------------|------------|------------|-----------|-----------|-----------------------|
| Pb1  | 6c               | 0.0000     | 0.0000     | 0.2847(1) | 0.96(2)   | 0.45(2)               |
| Pb2  | 18h              | 0.4148(4)  | 0.5852(4)  | 0.1665(4) | 0.1667    | 0.72(5)               |
| C1   | 6c               | 0.0000     | 0.0000     | 0.0736(3) | 1         | 1                     |
| O1   | 18h              | 0.9039(34) | 0.0961(34) | 0.0736(3) | 1         | 18.37                 |
| O2   | 18h              | 0.7248(40) | 0.2752(40) | 0.1407(5) | 0.3333    | 1                     |

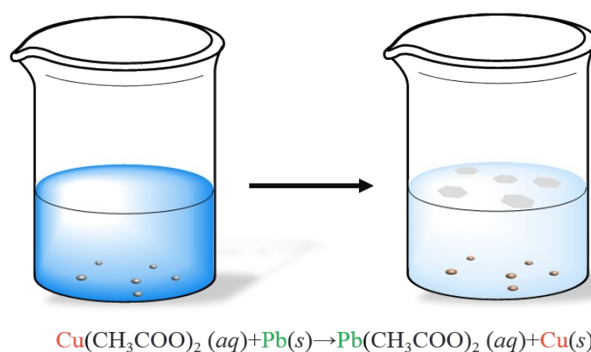

**Figure S1.** Schematic illustrations of synthesis through displacement reaction

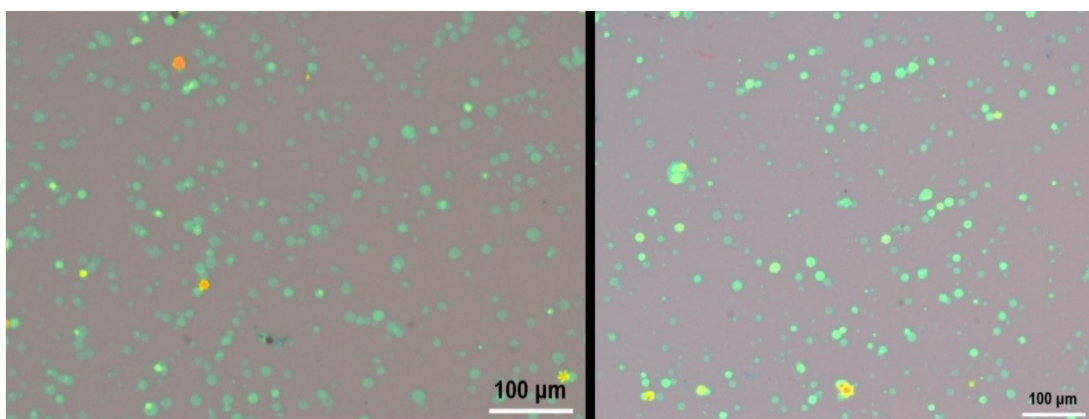

**Figure S2.** Optical microscopy for hexagonal structures on HMDs/Si(100).

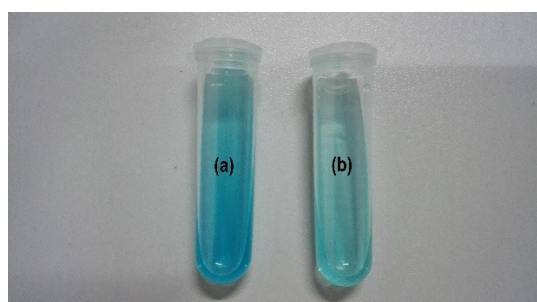

**Figure S3.** Photograph of  $\text{H}_2\text{O}_2$  (13.3 mM) and TMB (0.5 mM) solutions in the presence of the prepared 2D nanosheets and the commercial  $2\text{PbCO}_3 \cdot \text{Pb}(\text{OH})_2$  (400  $\mu\text{L}$ , 1.33 mg/mL). (a) the prepared 2D nanosheets (b) the commercial  $2\text{PbCO}_3 \cdot \text{Pb}(\text{OH})_2$ .

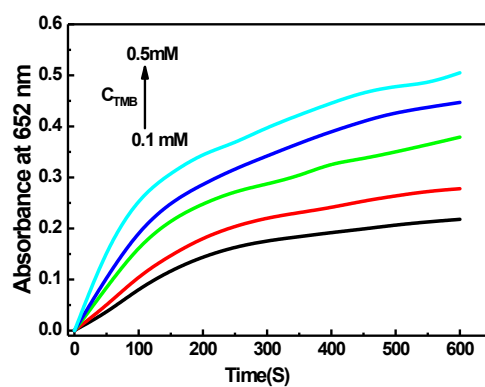

**Figure S4.** The time-dependent absorbance changes at 652 nm in the presence of the nanosheets with various concentrations of TMB.

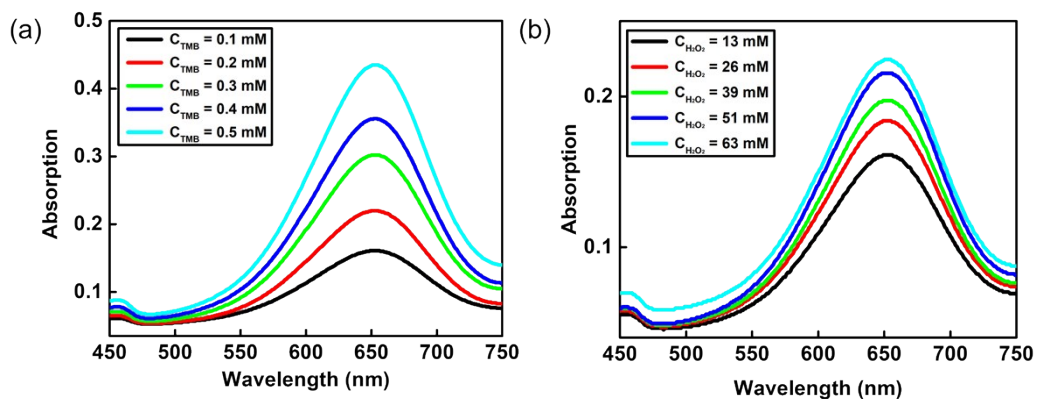

**Figure S5.** (a) UV-visible spectra of TMB (0.1-0.5 mM) and  $\text{H}_2\text{O}_2$  (13 mM) solutions in the presence of the nanosheets. (b) UV-visible spectra of TMB (0.1 mM) and  $\text{H}_2\text{O}_2$  (13-63 mM) solutions in the presence of the nanosheets.

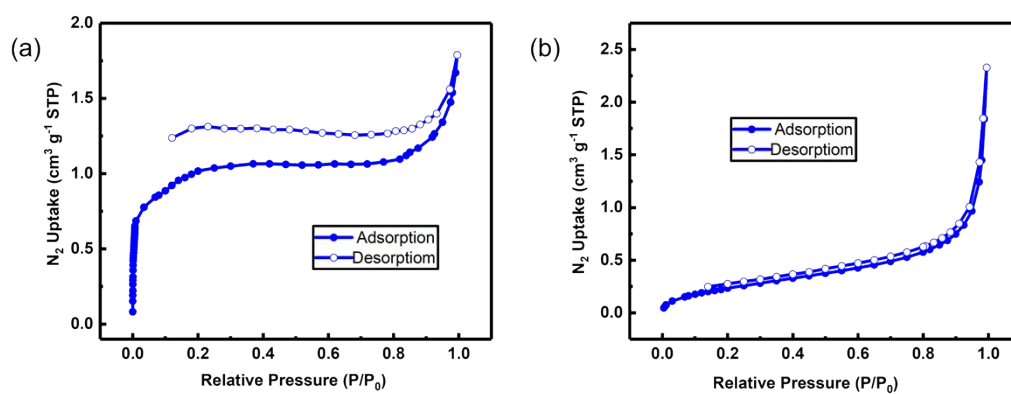

**Figure S6.**  $\text{N}_2$  adsorption-desorption isotherms (77 K) of the 2D nanosheets (a) and the commercial  $2\text{PbCO}_3 \cdot \text{Pb}(\text{OH})_2$  (b)
